# Supplementary material
Source: PubMed Central journal article supplement (PMC4534644)
Supplement: IAI.00545-15_zii999091385so1.pdf [file IAI.00545-15_zii999091385so1.pdf]

# Supplementary Figure 1

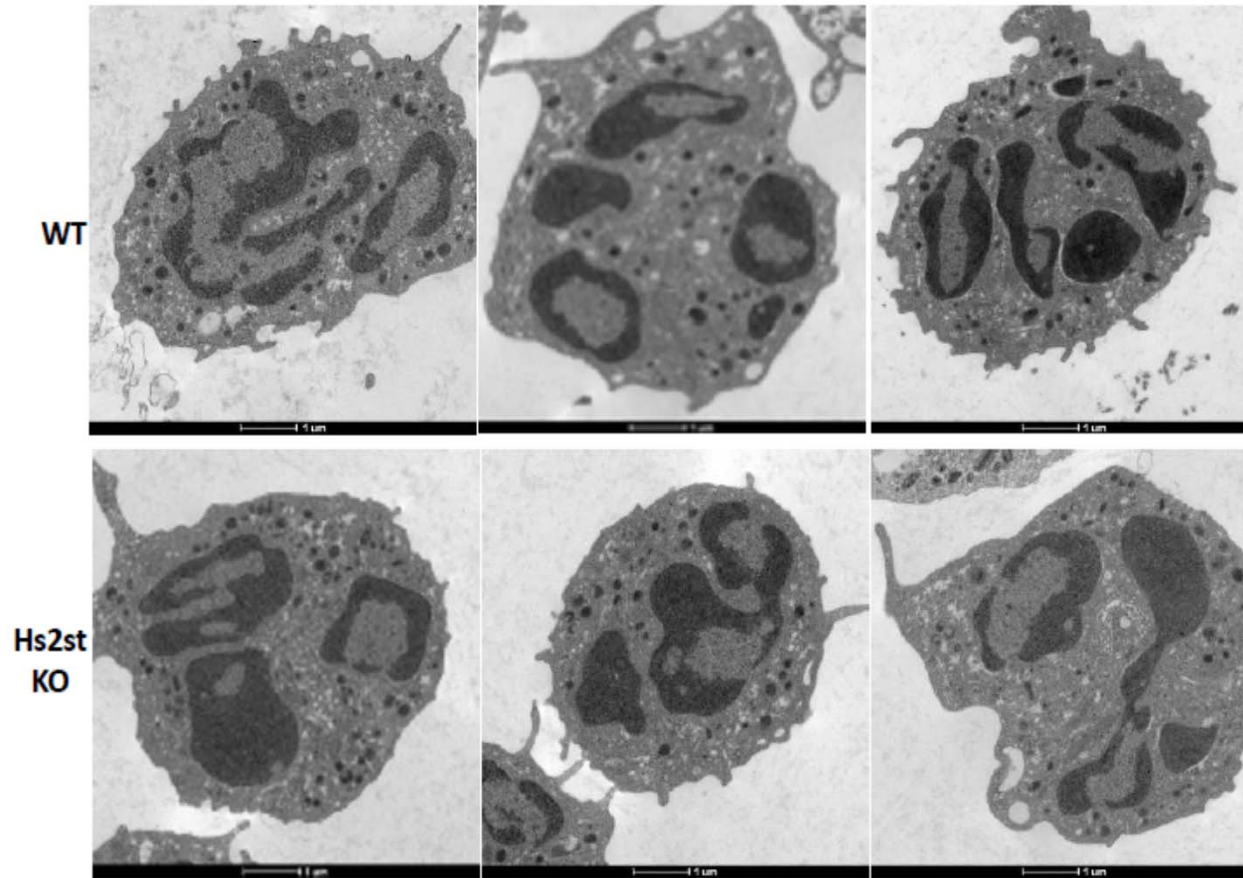

Supplementary Figure 1. LPS-elicited neutrophils were collected, fixed and subjected to transmission electron microscope analysis to observe the detail morphology of neutrophils.
